# Supplementary material for: Enhanced electrocatalytic activity and stability of Pd3V/C nanoparticles with a trace amount of Pt decoration for the oxygen reduction reaction
Source: Royal Society of Chemistry journal article supplement (doi:10.1039/c5ta05202e), 2015-01-01
Supplement: c5ta05202e1.pdf [file c5ta05202e1.pdf]

Supporting information

## Enhanced Electrocatalytic Activity and Stability of Pd<sub>3</sub>V/C Nanoparticles by a Trace Amount of Pt Decoration for the Oxygen Reduction Reaction

Sufen Liu, Lili Han, Jing Zhu, Weiping Xiao, Jie Wang, Hongfang Liu, Huolin Xin and Deli Wang\*

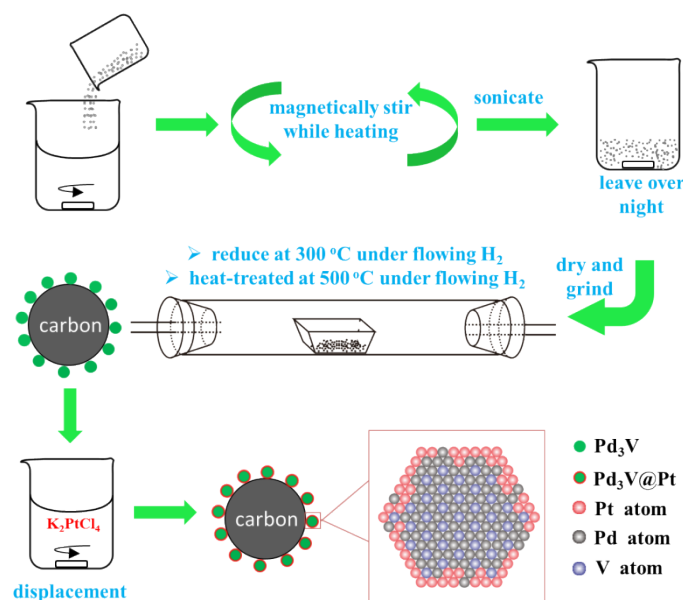

Fig. S1. Illustration of the synthesis procedure for Pd<sub>3</sub>V@Pt/C nanoparticles.

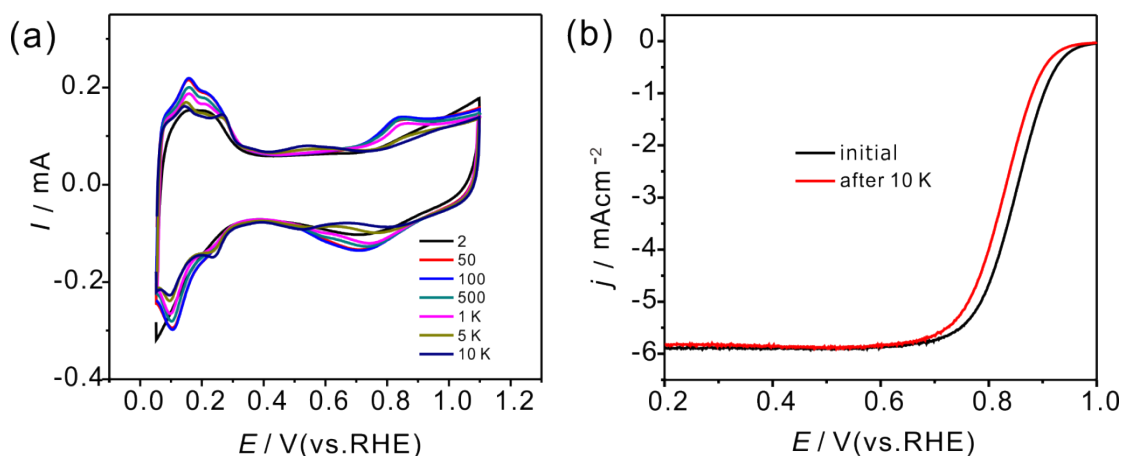

Fig. S2 (a) CV curves of Pt/C after different cycles. (b) The corresponding ORR polarization curves of Pt/C after cycling.

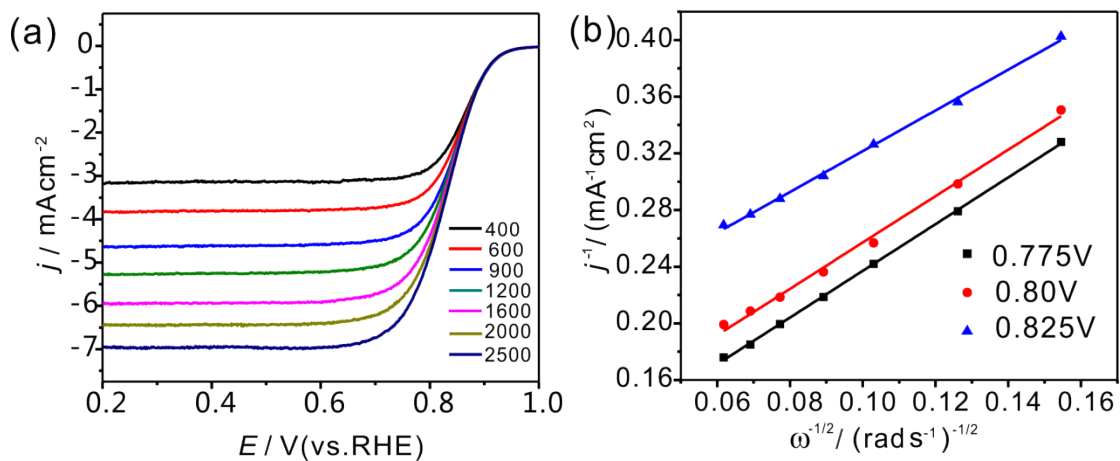

Figure S3 (a) The rotation-rate-dependent current-potential curves of Pd<sub>3</sub>V@Pt/C. (b) The Koutecky-Levich plots at 0.775 V, 0.80 V and 0.825 V.

Table S1 The EDS results of Pd<sub>3</sub>V@Pt/C and Pt-Pd<sub>3</sub>V/C.

| Sample                           | Weight%         | Atom%            |
|----------------------------------|-----------------|------------------|
| Pd <sub>3</sub> V@Pt/C (Pt:Pd:V) | 5.72:86.33:7.95 | 2.94:81.41:15.65 |
| Pt-Pd <sub>3</sub> V/C (Pt:Pd:V) | 4.52:86.81:8.67 | 2.3:80.84:16.86  |

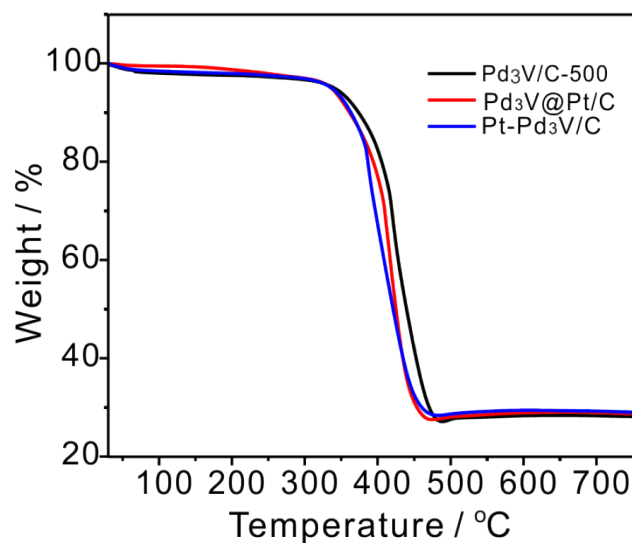

Figure S4 TGA of Pd<sub>3</sub>V/C-500, Pd<sub>3</sub>V@Pt/C and Pt-Pd<sub>3</sub>V/C catalysts.
